# Supplementary material for: Regulation of Pancreatic microRNA-7 Expression
Source: Hindawi journal article supplement (doi:10.1155/2012/695214), 2012-01-01
Supplement: f1 [file 695214.f1.pdf]

Table S1. Primers used in this study

| <b>Gene name</b>               | <b>Forward Primer</b> | <b>Reverse Primer</b> |
|--------------------------------|-----------------------|-----------------------|
| Pre-7b                         | ACGTGAGCCAGTGCTATGTG  | TAGGAGTCCACGCTATGAGG  |
| Pre-7a-1                       | CTGTAGAGGTGGCCTGTGC   | TGGCCTAGTTCTGTGTGGAA  |
| Pre-7a-2                       | AGCCCCGTTTGGAAGACTA   | TGAAATGACCAGCACCATGT  |
| Block1<br>promoter<br>fragment | ATATTCTCCAGCCTGCCTCA  | GAAAAGTGACCTGCCCTTGA  |
| Block2<br>promoter<br>fragment | GGAGGGGTAGAGCAAAGAGG  | TCTGGGCCAGCCTCTAATTG  |
| Block3<br>promoter<br>fragment | TTTTGGACGGATGCCTGACT  | CTTTATGCGCTTAAGGGGAAG |
